# Supplementary material for: Occurrence of a functionally stable photoharvesting single peptide allophycocyanin α-subunit (16.4 kDa) in the cyanobacterium Nostoc sp. R76DM
Source: Royal Society of Chemistry journal article supplement (doi:10.1039/c5ra14508b), 2015-01-01
Supplement: c5ra14508b1.pdf [file c5ra14508b1.pdf]

**Supplementary materials**

**Occurrence of a functionally stable photoharvesting single peptide allophycocyanin**

**$\alpha$ -subunit (16.4 kDa) in the cyanobacterium *Nostoc* sp. R76DM**

Rajesh P Rastogi\*<sup>§</sup>, Ravi R Sonani<sup>§</sup>, Avani B Patel, Datta Madamwar\*

BRD School of Biosciences, Sardar Patel University, Vadtal Road, Satellite Campus, Vallabh Vidyanagar 388120, Gujarat, India.

\*Corresponding author. Tel.: +91 02692 229380; fax: +91 02692 231042/236475.

E-mail addresses: raj\_rastogi@rediffmail.com (R.P. Rastogi), ravi123sonani@gmail.com (R.R. Sonani), datta\_madamwar@yahoo.com (D. Madamwar).

<sup>§</sup> Contributed equally

## Supplementary figure 1

High performance gel permeation chromatogram of *Nostoc* APC under non-denaturing (A) and denaturing (B) conditions

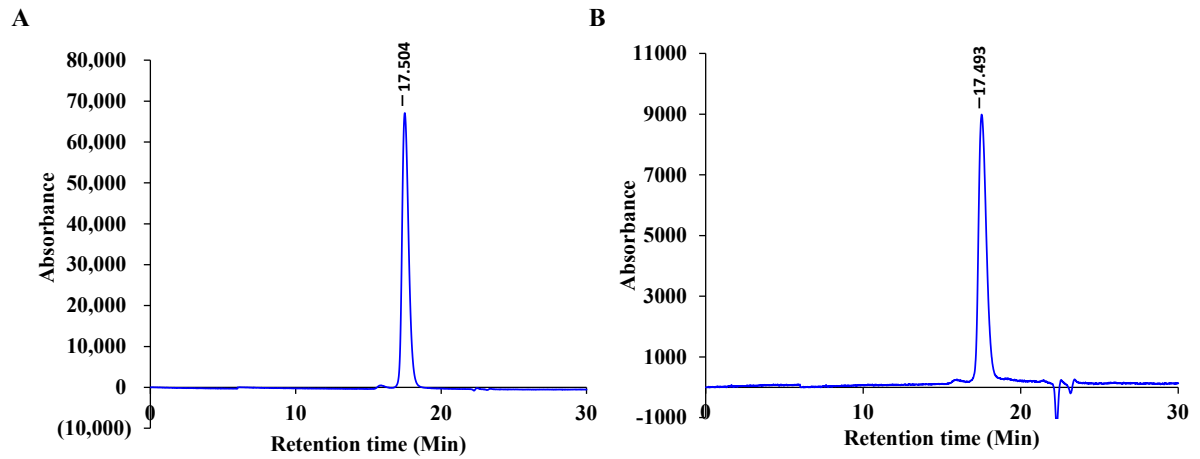

## Supplementary figure 2

Results of Mascot search analysis using the peptide mass fingerprint of *Nostoc* APC

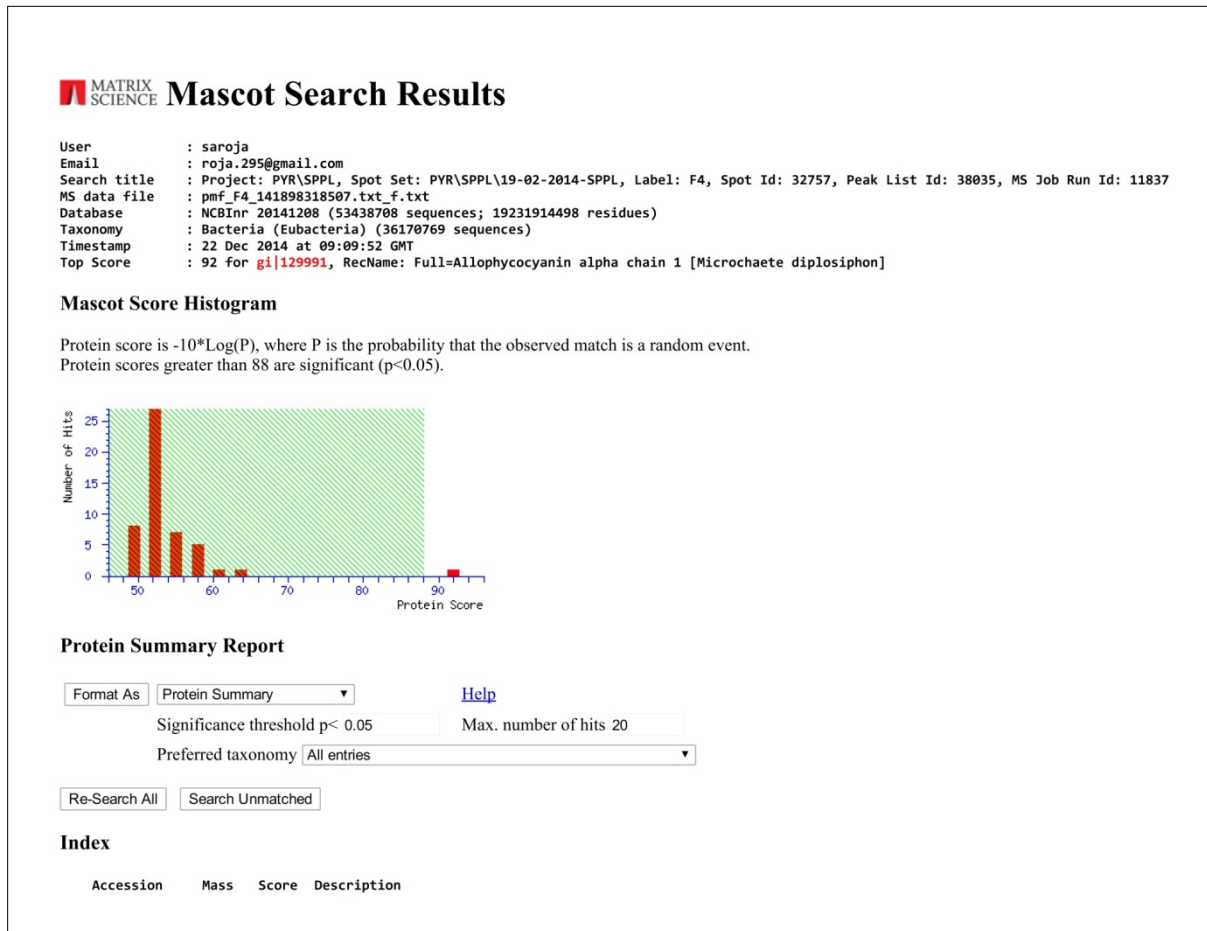

## Supplementary figure 2 (Contd.)

|                                  |       |    |                                                                                                      |
|----------------------------------|-------|----|------------------------------------------------------------------------------------------------------|
| 1. <a href="#">gi 129991</a>     | 17411 | 92 | RecName: Full=Allophycocyanin alpha chain 1 [Microchaete diplosiphon]                                |
| 2. <a href="#">gi 631269561</a>  | 25566 | 62 | UDP-N-acetylglucosamine pyrophosphorylase [Microbacterium sp. CH12i]                                 |
| 3. <a href="#">gi 547916457</a>  | 61542 | 61 | phosphoglucosyltransferase/phosphomannosyltransferase alpha/beta/alpha domain II [Dorea sp. CAG:317] |
| 4. <a href="#">gi 446245156</a>  | 20910 | 58 | hypothetical protein [Helicobacter pylori]                                                           |
| 5. <a href="#">gi 684624482</a>  | 27166 | 58 | hypothetical protein JCM19239_4096 [Vibrio variabilis]                                               |
| 6. <a href="#">gi 517959773</a>  | 32498 | 58 | hypothetical protein [Bacteroidales bacterium ph8]                                                   |
| 7. <a href="#">gi 506359044</a>  | 34434 | 57 | regulatory protein [Tolomonas auensis]                                                               |
| 8. <a href="#">gi 658945776</a>  | 36401 | 56 | methionine synthase, partial [Vibrio parahaemolyticus]                                               |
| 9. <a href="#">gi 551200527</a>  | 59166 | 56 | hypothetical protein [Flavobacterium antarcticum]                                                    |
| 10. <a href="#">gi 647607904</a> | 36999 | 56 | rod shape-determining protein MreB [Prevotella paludivivens]                                         |
| 11. <a href="#">gi 494810447</a> | 30020 | 55 | hypothetical protein [Sulfurihydrogenibium yellowstonense]                                           |
| 12. <a href="#">gi 507052681</a> | 15214 | 55 | hypothetical protein [Bacillus cereus]                                                               |
| 13. <a href="#">gi 654940760</a> | 7394  | 55 | hypothetical protein [Bacillus sp. FJAT-14515]                                                       |
| 14. <a href="#">gi 446059331</a> | 79522 | 54 | tyrosine kinase [Escherichia coli]                                                                   |
| 15. <a href="#">gi 510898678</a> | 79508 | 54 | tyrosine-protein kinase wzc [Escherichia coli]                                                       |
| 16. <a href="#">gi 517798414</a> | 15922 | 54 | hypothetical protein [Rubritalea marina]                                                             |
| 17. <a href="#">gi 515777716</a> | 76223 | 53 | hypothetical protein [Clostridium beijerinckii]                                                      |
| 18. <a href="#">gi 657059983</a> | 17752 | 53 | rRNA methylase [Aeromonas hydrophila]                                                                |
| 19. <a href="#">gi 491449787</a> | 17688 | 53 | MULTISPECIES: rRNA methyltransferase [Aeromonas]                                                     |
| 20. <a href="#">gi 648322413</a> | 17695 | 53 | rRNA methylase [Aeromonas hydrophila]                                                                |

### Results List

|                                                                       |                              |             |           |               |                                                    |
|-----------------------------------------------------------------------|------------------------------|-------------|-----------|---------------|----------------------------------------------------|
| 1.                                                                    | <a href="#">gi 129991</a>    | Mass: 17411 | Score: 92 | Expect: 0.023 | Matches: 6                                         |
| RecName: Full=Allophycocyanin alpha chain 1 [Microchaete diplosiphon] |                              |             |           |               |                                                    |
|                                                                       | Observed                     | Mr(expt)    | Mr(calc)  | ppm           | Start End Miss Peptide                             |
|                                                                       | 957.3620                     | 956.3547    | 956.4603  | -110.41       | 84 - 90 0 R.DLDYLR.L                               |
|                                                                       | 1049.4099                    | 1048.4026   | 1048.5189 | -110.90       | 17 - 25 0 R.YLSPGELDR.I                            |
|                                                                       | 1290.5637                    | 1289.5564   | 1289.6979 | -109.71       | 17 - 27 1 R.YLSPGELDRK.S                           |
|                                                                       | 1326.5674                    | 1325.5601   | 1325.7779 | -164.26       | 37 - 47 1 R.LRIAQILTENR.E                          |
|                                                                       | 2010.8370                    | 2009.8297   | 2009.0139 | 406           | 114 - 131 1 R.EMYKSLGTPIEGITEGIR.A + Oxidation (M) |
|                                                                       | 2358.0510                    | 2357.0437   | 2357.2842 | -102.03       | 91 - 113 0 R.LVTYGVISGDVPIEEIGVIGAR.E              |
| No match to: 1580.6538, 1867.7657                                     |                              |             |           |               |                                                    |
| 2.                                                                    | <a href="#">gi 631269561</a> | Mass: 25566 | Score: 62 | Expect: 22    | Matches: 5                                         |
| UDP-N-acetylglucosamine pyrophosphorylase [Microbacterium sp. CH12i]  |                              |             |           |               |                                                    |
|                                                                       | Observed                     | Mr(expt)    | Mr(calc)  | ppm           | Start End Miss Peptide                             |
|                                                                       | 957.3620                     | 956.3547    | 956.4087  | -56.43        | 77 - 84 0 R.YDETNTSK.S                             |
|                                                                       | 1049.4099                    | 1048.4026   | 1048.5600 | -150.09       | 175 - 182 1 K.AFMRQLQR.V                           |
|                                                                       | 1580.6538                    | 1579.6465   | 1579.8062 | -101.07       | 1 - 15 0 -.MTLQTVILAAGMGR.L + 2 Oxidation (M)      |
|                                                                       | 1867.7657                    | 1866.7584   | 1866.9509 | -103.11       | 157 - 174 1 K.GGLGEAVGINYISSMQKK.A + Oxidation (M) |
|                                                                       | 2358.0510                    | 2357.0437   | 2356.1798 | 367           | 133 - 153 1 K.VSDEEVKYTVTAEGFINQLSK.S              |
| No match to: 1290.5637, 1326.5674, 2010.8370                          |                              |             |           |               |                                                    |

## Supplementary figure 2 (Contd.)

3. [gi|547916457](#) Mass: 61542 Score: 61 Expect: 28 Matches: 6  
 phosphoglucomutase/phosphomannomutase alpha/beta/alpha domain II [Dorea sp. CAG:317]
- | Observed  | Mr(expt)  | Mr(calC)  | ppm     | Start | End   | Miss | Peptide                        |
|-----------|-----------|-----------|---------|-------|-------|------|--------------------------------|
| 957.3620  | 956.3547  | 956.5226  | -175.47 | 215   | - 222 | 0    | R.QVRPGLCK.T                   |
| 1049.4099 | 1048.4026 | 1048.5157 | -107.89 | 469   | - 477 | 0    | K.MAGIMQNL.R.E + Oxidation (M) |
| 1290.5637 | 1289.5564 | 1289.5598 | -2.59   | 441   | - 450 | 0    | R.MEETYTEYGR.Y                 |
| 1326.5674 | 1325.5601 | 1325.7415 | -136.83 | 100   | - 113 | 0    | K.TAAGVLAANGINVR.I             |
| 2010.8370 | 2009.8297 | 2009.9451 | -57.42  | 130   | - 147 | 1    | R.YYKCNAGVMVTASHNPAK.Y         |
| 2358.0510 | 2357.0437 | 2357.1368 | -39.50  | 395   | - 414 | 1    | R.FIFGFEEESYGLAGPYVRDK.D       |
- No match to: 1580.6538, 1867.7657
4. [gi|446245156](#) Mass: 20910 Score: 58 Expect: 51 Matches: 5  
 hypothetical protein [Helicobacter pylori]
- | Observed  | Mr(expt)  | Mr(calC)  | ppm     | Start | End   | Miss | Peptide                         |
|-----------|-----------|-----------|---------|-------|-------|------|---------------------------------|
| 957.3620  | 956.3547  | 956.4498  | -99.37  | 97    | - 103 | 1    | R.MREEQHK.Q                     |
| 1049.4099 | 1048.4026 | 1048.5189 | -110.90 | 73    | - 81  | 0    | R.QAEAFDLQK.R                   |
| 1326.5674 | 1325.5601 | 1325.6034 | -32.63  | 82    | - 92  | 1    | K.RQAEQSMDFAK.S + Oxidation (M) |
| 1580.6538 | 1579.6465 | 1579.8570 | -133.20 | 153   | - 167 | 0    | K.VPLTTQSAPITPNNK.T             |
| 2010.8370 | 2009.8297 | 2009.1157 | 355     | 153   | - 171 | 1    | K.VPLTTQSAPITPNNK.TLSK.E        |
- No match to: 1290.5637, 1867.7657, 2358.0510
5. [gi|684624482](#) Mass: 27166 Score: 58 Expect: 59 Matches: 5  
 hypothetical protein JCM19239\_4096 [Vibrio variabilis]
- | Observed  | Mr(expt)  | Mr(calC)  | ppm     | Start | End   | Miss | Peptide                                  |
|-----------|-----------|-----------|---------|-------|-------|------|------------------------------------------|
| 957.3620  | 956.3547  | 956.5291  | -182.27 | 173   | - 180 | 1    | K.TPKNQIEK.W                             |
| 1049.4099 | 1048.4026 | 1048.5526 | -143.04 | 105   | - 113 | 1    | K.SYGRRTGR.F                             |
| 1867.7657 | 1866.7584 | 1866.8968 | -74.11  | 1     | - 17  | 1    | -.MSTGNKPKNLDGAMEK.K                     |
| 2010.8370 | 2009.8297 | 2009.1019 | 362     | 137   | - 154 | 1    | R.LQAGEKWPPIGELALLK.S + Oxidation (M)    |
| 2358.0510 | 2357.0437 | 2356.1481 | 380     | 109   | - 128 | 1    | R.RPTGRFLDFADSLTESELMR.V + Oxidation (M) |
- No match to: 1290.5637, 1326.5674, 1580.6538
6. [gi|517959773](#) Mass: 32498 Score: 58 Expect: 60 Matches: 5  
 hypothetical protein [Bacteroidales bacterium ph8]
- | Observed  | Mr(expt)  | Mr(calC)  | ppm     | Start | End   | Miss | Peptide                   |
|-----------|-----------|-----------|---------|-------|-------|------|---------------------------|
| 1290.5637 | 1289.5564 | 1289.6463 | -69.68  | 128   | - 139 | 0    | R.SLVDESLETAAR.N          |
| 1326.5674 | 1325.5601 | 1325.6550 | -71.59  | 211   | - 220 | 1    | K.YILCRFSPDR.G            |
| 1580.6538 | 1579.6465 | 1579.8358 | -119.83 | 55    | - 68  | 1    | K.EVVTGYPYARYAQK.F        |
| 1867.7657 | 1866.7584 | 1866.0350 | 388     | 37    | - 54  | 0    | R.VEVGIPITPLAVDLTVEK.E    |
| 2358.0510 | 2357.0437 | 2357.1719 | -54.39  | 3     | - 24  | 0    | K.TLVLLCCTALTIVGSASQSYR.V |
- No match to: 957.3620, 1049.4099, 2010.8370
7. [gi|506359044](#) Mass: 34434 Score: 57 Expect: 77 Matches: 5  
 regulatory protein [Tolomonas auensis]

## Supplementary figure 2 (Contd.)

| Observed  | Mr(expt)  | Mr(calc)  | ppm     | Start | End | Miss | Peptide |                                  |
|-----------|-----------|-----------|---------|-------|-----|------|---------|----------------------------------|
| 1049.4099 | 1048.4026 | 1048.5553 | -145.59 | 182   | -   | 191  | 0       | R.SKPVAAVDIAK.I                  |
| 1290.5637 | 1289.5564 | 1289.7343 | -137.92 | 182   | -   | 193  | 1       | R.SKPVAAVDIAK.K                  |
| 1326.5674 | 1325.5601 | 1325.5704 | -7.73   | 62    | -   | 73   | 1       | K.MSDRCGGLEASK.D + Oxidation (M) |
| 1867.7657 | 1866.7584 | 1866.8716 | -60.64  | 66    | -   | 81   | 1       | R.CGGLEASKDNKPCIYR.C             |
| 2358.0510 | 2357.0437 | 2356.1369 | 385     | 279   | -   | 299  | 1       | R.QTFQVTPQMYRDLTVSDGLAS.-        |

No match to: 957.3620, 1580.6538, 2010.8370

8. [gi|658945776](#) Mass: 36401 Score: 56 Expect: 81 Matches: 5

methionine synthase, partial [Vibrio parahaemolyticus]

| Observed  | Mr(expt)  | Mr(calc)  | ppm     | Start | End | Miss | Peptide |                                       |
|-----------|-----------|-----------|---------|-------|-----|------|---------|---------------------------------------|
| 957.3620  | 956.3547  | 956.5291  | -182.27 | 7     | -   | 14   | 0       | R.QQIEAQLK.Q                          |
| 1049.4099 | 1048.4026 | 1048.4859 | -79.44  | 321   | -   | 330  | 0       | R.QMAQAVEGVV.- + Oxidation (M)        |
| 1580.6538 | 1579.6465 | 1579.6937 | -29.85  | 140   | -   | 153  | 0       | R.TCSISPDVNDPGYR.N                    |
| 2010.8370 | 2009.8297 | 2009.0438 | 391     | 15    | -   | 32   | 1       | K.QRILLIDGGMGTMIGYK.L + Oxidation (M) |
| 2358.0510 | 2357.0437 | 2356.3366 | 300     | 170   | -   | 191  | 1       | R.ALIRGGADLILIEITIFDTLNAK.A           |

No match to: 1290.5637, 1326.5674, 1867.7657

9. [gi|551200527](#) Mass: 59166 Score: 56 Expect: 89 Matches: 6

hypothetical protein [Flavobacterium antarcticum]

| Observed  | Mr(expt)  | Mr(calc)  | ppm     | Start | End | Miss | Peptide |                      |
|-----------|-----------|-----------|---------|-------|-----|------|---------|----------------------|
| 957.3620  | 956.3547  | 956.4603  | -110.43 | 317   | -   | 324  | 0       | K.YLGTDFNFK.K        |
| 1049.4099 | 1048.4026 | 1048.6393 | -225.70 | 253   | -   | 261  | 1       | K.LVPTHKLNK.K        |
| 1326.5674 | 1325.5601 | 1325.7303 | -128.35 | 191   | -   | 203  | 0       | K.NLASISHSLSIGSK.E   |
| 1580.6538 | 1579.6465 | 1579.8253 | -113.14 | 2     | -   | 14   | 1       | M.HLDLIDICRPARS.V    |
| 1867.7657 | 1866.7584 | 1866.8159 | -30.81  | 419   | -   | 433  | 0       | K.EPQIFDFLNEDDEEK.N  |
| 2010.8370 | 2009.8297 | 2009.0047 | 411     | 68    | -   | 83   | 1       | K.ANYDFDFVRNESLFLK.N |

No match to: 1290.5637, 2358.0510

10. [gi|647607904](#) Mass: 36999 Score: 56 Expect: 1e+02 Matches: 5

rod shape-determining protein MreB [Prevotella paludivivens]

| Observed  | Mr(expt)  | Mr(calc)  | ppm     | Start | End | Miss | Peptide |                                       |
|-----------|-----------|-----------|---------|-------|-----|------|---------|---------------------------------------|
| 957.3620  | 956.3547  | 956.3948  | -41.88  | 121   | -   | 129  | 0       | R.DSAEHADGR.D                         |
| 1049.4099 | 1048.4026 | 1048.5587 | -148.82 | 41    | -   | 50   | 1       | R.TDKMIAVGAK.A + Oxidation (M)        |
| 1290.5637 | 1289.5564 | 1289.7092 | -118.43 | 285   | -   | 297  | 0       | K.NGIYLSGGGALLR.G                     |
| 1867.7657 | 1866.7584 | 1866.9774 | -117.30 | 324   | -   | 340  | 1       | K.GAGIALKNVNNFSFLMR.- + Oxidation (M) |
| 2358.0510 | 2357.0437 | 2357.2743 | -97.82  | 303   | -   | 323  | 1       | R.LTDKINIPFHIAEDPLHSVAK.G             |

No match to: 1326.5674, 1580.6538, 2010.8370

11. [gi|494810447](#) Mass: 30020 Score: 55 Expect: 1.1e+02 Matches: 5

hypothetical protein [Sulfurihydrogenibium yellowstonense]

| Observed | Mr(expt) | Mr(calc) | ppm     | Start | End | Miss | Peptide |               |
|----------|----------|----------|---------|-------|-----|------|---------|---------------|
| 957.3620 | 956.3547 | 956.5542 | -208.57 | 164   | -   | 172  | 0       | R.EILALVDGK.N |

## Supplementary figure 2 (Contd.)

1290.5637 1289.5564 1289.7594 -157.41 242 - 252 0 R.ILSVLESKPIK.Q  
 1580.6538 1579.6465 1579.7803 -84.70 136 - 148 1 K.ITDPEMIFEKTEK.A  
 2010.8370 2009.8297 2008.9968 415 55 - 70 1 R.SFFLYMDLDFESVLKR.D  
 2358.0510 2357.0437 2357.3569 -132.86 106 - 125 1 K.YSEDIKPLINTEKLIILLSR.N  
**No match to:** 1049.4099, 1326.5674, 1867.7657

12. [gi|507052681](#) Mass: 15214 Score: 55 Expect: 1.2e+02 Matches: 4  
 hypothetical protein [Bacillus cereus]  

| Observed  | Mr(expt)  | Mr(calc)  | ppm     | Start | End | Miss | Peptide                   |
|-----------|-----------|-----------|---------|-------|-----|------|---------------------------|
| 1049.4099 | 1048.4026 | 1048.5414 | -132.32 | 121   | -   | 128  | 1 K.FETRNNIR.K            |
| 1290.5637 | 1289.5564 | 1289.7343 | -137.93 | 14    | -   | 25   | 1 R.IFKGLSAQELGK.E        |
| 2010.8370 | 2009.8297 | 2010.0269 | -98.12  | 63    | -   | 80   | 1 R.LLNHKISDSVIPDDTTK.K   |
| 2358.0510 | 2357.0437 | 2357.1903 | -62.19  | 43    | -   | 62   | 1 K.EPNFEVLQKISVYFVSTDR.L |

**No match to:** 957.3620, 1326.5674, 1580.6538, 1867.7657

13. [gi|654940760](#) Mass: 7394 Score: 55 Expect: 1.2e+02 Matches: 4  
 hypothetical protein [Bacillus sp. FJAT-14515]  

| Observed  | Mr(expt)  | Mr(calc)  | ppm     | Start | End | Miss | Peptide                       |
|-----------|-----------|-----------|---------|-------|-----|------|-------------------------------|
| 957.3620  | 956.3547  | 956.4749  | -125.68 | 13    | -   | 20   | 1 K.KHVMEGEK.S                |
| 1049.4099 | 1048.4026 | 1048.4510 | -46.19  | 1     | -   | 7    | 0 -.MMVYCFK.T + Oxidation (M) |
| 1290.5637 | 1289.5564 | 1289.6049 | -37.60  | 1     | -   | 9    | 1 -.MMVYCFKTR.M               |
| 1867.7657 | 1866.7584 | 1867.0013 | -130.06 | 30    | -   | 46   | 0 K.LTGTATMVDLYLLIDK.A        |

**No match to:** 1326.5674, 1580.6538, 2010.8370, 2358.0510

14. [gi|446059331](#) Mass: 79522 Score: 54 Expect: 1.3e+02 Matches: 6  
 tyrosine kinase [Escherichia coli]  

| Observed  | Mr(expt)  | Mr(calc)  | ppm     | Start | End | Miss | Peptide                                     |
|-----------|-----------|-----------|---------|-------|-----|------|---------------------------------------------|
| 957.3620  | 956.3547  | 956.5655  | -220.32 | 23    | -   | 31   | 0 R.LVGTVIEAR.W                             |
| 1290.5637 | 1289.5564 | 1289.6584 | -79.07  | 557   | -   | 566  | 1 K.RVLLIDCDMR.K                            |
| 1326.5674 | 1325.5601 | 1325.7455 | -139.86 | 337   | -   | 347  | 1 K.VHPAYRTLLEK.R                           |
| 1580.6538 | 1579.6465 | 1579.7777 | -83.01  | 138   | -   | 150  | 1 K.VTTFNRPKEMADR.V + Oxidation (M)         |
| 1867.7657 | 1866.7584 | 1866.9199 | -86.51  | 116   | -   | 131  | 1 K.NTFPIFGAGWERLMGR.Q + Oxidation (M)      |
| 2358.0510 | 2357.0437 | 2356.2097 | 354     | 610   | -   | 630  | 1 R.GQVPPNPSELLMSERFAELVK.W + Oxidation (M) |

**No match to:** 1049.4099, 2010.8370

15. [gi|510898678](#) Mass: 79508 Score: 54 Expect: 1.3e+02 Matches: 6  
 tyrosine-protein kinase wzc [Escherichia coli]  

| Observed  | Mr(expt)  | Mr(calc)  | ppm     | Start | End | Miss | Peptide                                |
|-----------|-----------|-----------|---------|-------|-----|------|----------------------------------------|
| 957.3620  | 956.3547  | 956.5655  | -220.32 | 23    | -   | 31   | 0 R.LVGTVIEAR.W                        |
| 1290.5637 | 1289.5564 | 1289.6584 | -79.07  | 557   | -   | 566  | 1 K.RVLLIDCDMR.K                       |
| 1326.5674 | 1325.5601 | 1325.7455 | -139.86 | 337   | -   | 347  | 1 K.VHPAYRTLLEK.R                      |
| 1580.6538 | 1579.6465 | 1579.7777 | -83.01  | 138   | -   | 150  | 1 K.VTTFNRPKEMADR.V + Oxidation (M)    |
| 1867.7657 | 1866.7584 | 1866.9199 | -86.51  | 116   | -   | 131  | 1 K.NTFPIFGAGWERLMGR.Q + Oxidation (M) |

## Supplementary figure 2 (Contd.)

2358.0510 2357.0437 2356.2097 354 610 - 630 1 R.GQVPPNPSELLMSERFAELVK.W + Oxidation (M)  
 No match to: 1049.4099, 2010.8370

16. [gi|517798414](#) Mass: 15922 Score: 54 Expect: 1.6e+02 Matches: 4  
 hypothetical protein [Rubritalea marina]
- | Observed  | Mr(expt)  | Mr(calc)  | ppm    | Start | End | Miss | Peptide                                     |
|-----------|-----------|-----------|--------|-------|-----|------|---------------------------------------------|
| 1049.4099 | 1048.4026 | 1048.5050 | -97.63 | 81    | 89  | 0    | R.HLAETHDAR.F                               |
| 1580.6538 | 1579.6465 | 1579.6541 | -4.82  | 1     | 14  | 1    | -.MGDASQCPKCGTPE + Oxidation (M)            |
| 2010.8370 | 2009.8297 | 2009.1170 | 355    | 55    | 74  | 1    | K.ALKRVIHGYGASSGVSVIAPR.A                   |
| 2358.0510 | 2357.0437 | 2356.2685 | 329    | 58    | 80  | 1    | R.VIHGYGASSGVSVIAPRAISLMR.H + Oxidation (M) |
- No match to: 957.3620, 1290.5637, 1326.5674, 1867.7657
17. [gi|515777716](#) Mass: 76223 Score: 53 Expect: 1.7e+02 Matches: 6  
 hypothetical protein [Clostridium beijerinckii]
- | Observed  | Mr(expt)  | Mr(calc)  | ppm     | Start | End | Miss | Peptide               |
|-----------|-----------|-----------|---------|-------|-----|------|-----------------------|
| 957.3620  | 956.3547  | 956.6018  | -258.32 | 202   | 209 | 1    | K.LDIKSIIR.C          |
| 1290.5637 | 1289.5564 | 1289.6728 | -90.21  | 499   | 508 | 1    | K.RQLNLFNEEK.E        |
| 1580.6538 | 1579.6465 | 1579.8431 | -124.40 | 559   | 574 | 1    | K.TSTSVGRAVAVPHGNK.E  |
| 1867.7657 | 1866.7584 | 1866.0251 | 393     | 187   | 201 | 1    | R.LTTEIYSRIQNIFIK.L   |
| 2010.8370 | 2009.8297 | 2009.9734 | -71.49  | 534   | 550 | 1    | K.YGQVLEDINVKSGYAK.S  |
| 2358.0510 | 2357.0437 | 2356.2865 | 321     | 222   | 240 | 1    | K.FIENDFYTLIKLILVSR.I |
- No match to: 1049.4099, 1326.5674
18. [gi|657059983](#) Mass: 17752 Score: 53 Expect: 1.8e+02 Matches: 4  
 rRNA methylase [Aeromonas hydrophila]
- | Observed  | Mr(expt)  | Mr(calc)  | ppm     | Start | End | Miss | Peptide                      |
|-----------|-----------|-----------|---------|-------|-----|------|------------------------------|
| 957.3620  | 956.3547  | 956.5113  | -163.72 | 122   | 129 | 0    | R.IPMLPQSR.S + Oxidation (M) |
| 1867.7657 | 1866.7584 | 1866.9628 | -109.48 | 29    | 43  | 1    | R.LHLIEPLGFWDKRV             |
| 2010.8370 | 2009.8297 | 2009.1309 | 348     | 105   | 121 | 1    | R.GLPIETIESLPFQRLR.I         |
| 2358.0510 | 2357.0437 | 2357.1876 | -61.05  | 82    | 104 | 1    | K.GRTAHSAVQFAAGDALLFGPESR.G  |
- No match to: 1049.4099, 1290.5637, 1326.5674, 1580.6538
19. [gi|491449787](#) Mass: 17688 Score: 53 Expect: 1.8e+02 Matches: 4  
 MULTISPECIES: rRNA methyltransferase [Aeromonas]
- | Observed  | Mr(expt)  | Mr(calc)  | ppm     | Start | End | Miss | Peptide                      |
|-----------|-----------|-----------|---------|-------|-----|------|------------------------------|
| 957.3620  | 956.3547  | 956.5113  | -163.72 | 122   | 129 | 0    | R.IPMLPQSR.S + Oxidation (M) |
| 1867.7657 | 1866.7584 | 1866.9628 | -109.48 | 29    | 43  | 1    | R.LHLIEPLGFWDKRV             |
| 2010.8370 | 2009.8297 | 2009.1309 | 348     | 105   | 121 | 1    | R.GLPIETIESLPFQRLR.I         |
| 2358.0510 | 2357.0437 | 2357.1876 | -61.05  | 82    | 104 | 1    | K.GRTAHSAVQFAAGDALLFGPESR.G  |
- No match to: 1049.4099, 1290.5637, 1326.5674, 1580.6538
20. [gi|648322413](#) Mass: 17695 Score: 53 Expect: 1.8e+02 Matches: 4  
 rRNA methylase [Aeromonas hydrophila]



## Supplementary figure 2 (Contd.)

| Observed  | Mr(expt)  | Mr(calc)  | ppm     | Start | End   | Miss | Peptide                      |
|-----------|-----------|-----------|---------|-------|-------|------|------------------------------|
| 957.3620  | 956.3547  | 956.5113  | -163.72 | 122   | - 129 | 0    | R.IPMLPQSR.S + Oxidation (M) |
| 1867.7657 | 1866.7584 | 1866.9628 | -109.48 | 29    | - 43  | 1    | R.LHLIEPLGFWDK.R.V           |
| 2010.8370 | 2009.8297 | 2009.1309 | 348     | 105   | - 121 | 1    | R.GLPETIIESLPFQRL.R.I        |
| 2358.0510 | 2357.0437 | 2357.1876 | -61.05  | 82    | - 104 | 1    | K.GRTAHSVQFAAGDALLFGPESR.G   |

No match to: 1049.4099, 1290.5637, 1326.5674, 1580.6538

### Search Parameters

Type of search : Peptide Mass Fingerprint  
Enzyme : Trypsin  
Fixed modifications : [Carbamidomethyl \(C\)](#)  
Variable modifications : [Oxidation \(M\)](#)  
Mass values : Monoisotopic  
Protein Mass : Unrestricted  
Peptide Mass Tolerance :  $\pm 420$  ppm  
Peptide Charge State : 1+  
Max Missed Cleavages : 1  
Number of queries : 8

Mascot: <http://www.matrixscience.com/>
